# Supplementary material
Source: publisher figshare collection journal article supplement (https://frontiersin.figshare.com/ndownloader/files/28448376)

## Supplementary material

**Table S1.** Summary of means and 95% confidence intervals of ungrazed and grazed tissue of *Fucus vesiculosus* after exposure to different levels of temperature (ambient or high), salinity (ambient or low), pCO<sub>2</sub> (ambient or elevated) as fixed, orthogonal factors, n= 10. The grazed tissue was grazed by the snail *Littorina obtusata*.

| Manipulated drivers:                      | Mean $\pm$ 95% CI |               |
|-------------------------------------------|-------------------|---------------|
|                                           | Ungrazed          | Grazed        |
| Ambient                                   | 3.5 $\pm$ 0.5     | 8.0 $\pm$ 2.4 |
| pCO <sub>2</sub>                          | 2.7 $\pm$ 0.4     | 2.9 $\pm$ 0.4 |
| Salinity                                  | 3.2 $\pm$ 0.3     | 3.0 $\pm$ 0.3 |
| Salinity & pCO <sub>2</sub>               | 2.4 $\pm$ 0.3     | 3.3 $\pm$ 0.5 |
| Temperature                               | 2.9 $\pm$ 0.3     | 2.9 $\pm$ 0.5 |
| Temperature & pCO <sub>2</sub>            | 2.9 $\pm$ 0.3     | 3.1 $\pm$ 0.5 |
| Temperature & Salinity                    | 3.1 $\pm$ 0.4     | 2.7 $\pm$ 0.4 |
| Temperature & Salinity & pCO <sub>2</sub> | 3.0 $\pm$ 0.5     | 2.7 $\pm$ 0.3 |

**Figure S1.** Phlorotannin content of *Fucus vesiculosus* in ungrazed and grazed tissue by *Littorina obtusata* after exposure to different levels of temperature (2 levels), salinity (2 levels), and pCO<sub>2</sub> (2 levels) as fixed, orthogonal factors. Letters below the bars indicate which climate drivers have been manipulated, *i.e.* T (temperature), S (salinity), and pCO<sub>2</sub>. Values are means  $\pm$  95% CI, n=10.

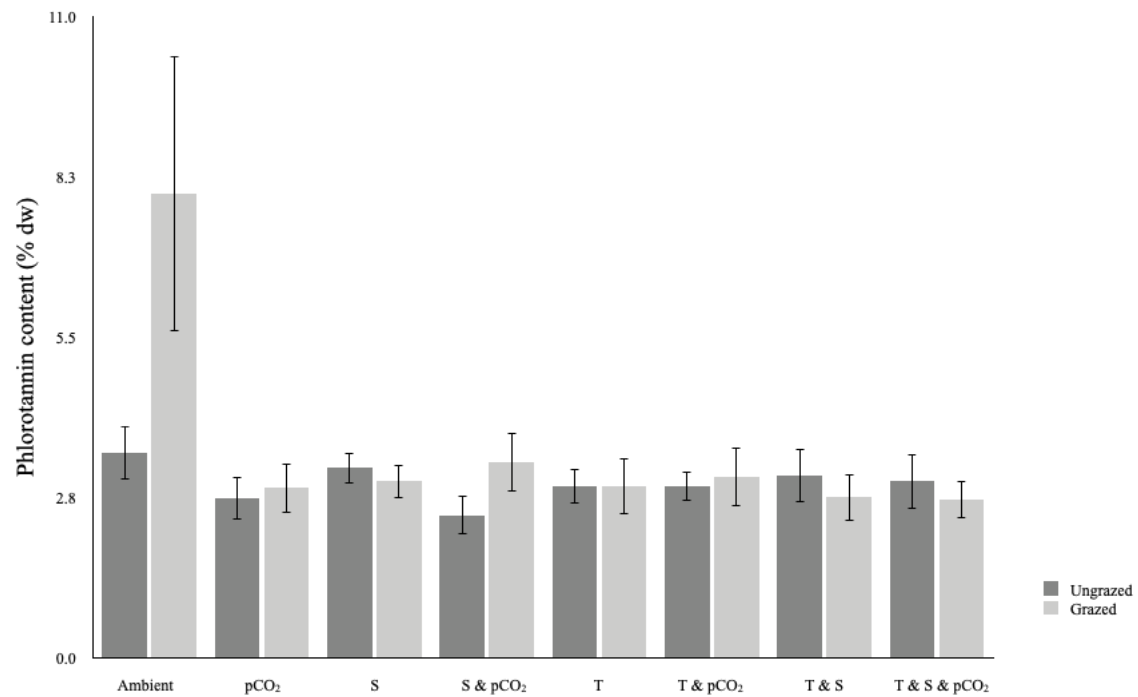

Supplement: Supplementary file 1 [file 28448376]
